# Supplementary material for: Plasticity of the proteasome-targeting signal Fat10 enhances substrate degradation
Source: eLife journal article supplement (doi:10.7554/elife.91122), 2024-07-10
Supplement: fig1-data1 [file elife-91122-fig1-data1-v2.zip]

## Sheet: Sheet1
FAT10-AV	0	0.5	1	2	3	4	6
	100	112.844	79.1106	38.9056		20.2399	12.0941
	100	84.4019	60.8065	56.6483	68.7159	46.4269	40.8857
	100	91.5156	78.1013	67.9753	56.8033		24.0093
Avg	100	96.2537	72.6728	54.5097	62.7596	33.3334	25.663
STD -error	0	4.27268	2.97014	4.22978	2.43163	5.34539	4.17624
Ub-GV	0	1	2	4	6
	100	91.277	101.777	98.4208	96.2686
	100	87.1618	139.652	115.337	139.64
	100	97.4746	77.6403		90.823
	100	91.9712	106.356	106.879	108.911
	0	1.4986	9.02357	3.45292	7.72249
D1-AV	0	0.25	0.5	0.75	1	1.5	2
	100	60.6689	42.1568	45.9592	41.8072	44.7972	30.6757
	100	52.3198	21.0774	30.5066	34.2153	30.7882	26.2633
	100	50.6438	46.4541	33.1287	35.15	28.8916	26.5434
	100	54.5442	36.5628	36.5315	37.0575	34.8257	27.8274
	0	1.55018	3.92071	2.38711	1.19507	2.50786	0.713205
D2-AV	0	0.25	0.5	0.75	1	1.5	2
	100	51.2769	43.6695	52.4783	32.3571	32.1707	36.1372
	100	58.6766	56.3163	56.3834	39.2588	29.9877	33.4909
	100	75.2279	31.966	21.7845	29.1255	22.1672	15.1194
	100	61.7272	43.984	43.5487	33.5805	28.1085	28.2491
	0	3.54015	3.51554	5.47017	1.49425	1.51838	3.30459
