# Supplementary material for: Plasticity of the proteasome-targeting signal Fat10 enhances substrate degradation
Source: eLife journal article supplement (doi:10.7554/elife.91122), 2024-07-10
Supplement: fig5-data1 [file elife-91122-fig5-data1-v2.zip]

## Sheet: Sheet1
		Supplementary Figure 13B, 13C, 13D: Source data_Fluorescence Scan
		CRABP1-SCAN					UB-CRABP1					FAT10-CRABP1
			No Dye	Dye + 0M Urea	Dye + 3M Urea			No Dye	Dye + 0M Urea	Dye + 3M Urea			No Dye	Dye + 0M Urea	Dye + 3M Urea
		510	103052	1219099	1815004		510	282337	949816	1660000		510	282337	1462464	2248398
		511	86907.8	1286304	1918802		511	229178	1030000	1860000		511	229178	1602222	2518537
		512	74704.5	1364429	2024351		512	195983	1130000	2090000		512	195983	1760705	2815056
		513	67595.6	1439313	2150328		513	169020	1240000	2340000		513	169020	1924030	3100340
		514	57979.2	1538540	2284726		514	148150	1370000	2590000		514	148150	2112430	3465486
		515	52441.2	1631143	2411331		515	130674	1500000	2880000		515	130674	2300874	3805049
		516	48899	1729629	2573969		516	122350	1650000	3190000		516	122350	2502051	4208061
		517	46968.7	1831341	2732998		517	111874	1770000	3500000		517	111874	2705429	4589471
		518	45968.6	1941556	2876670		518	104961	1910000	3790000		518	104961	2901810	4990124
		519	41563.4	2050995	3034444		519	95757.6	2050000	4150000		519	95757.6	3107958	5394754
		520	40302.1	2153403	3195504		520	87412.9	2180000	4470000		520	87412.9	3286156	5835170
		521	39552.6	2248371	3338925		521	82034.9	2300000	4770000		521	82034.9	3455207	6194436
		522	37120.1	2346146	3510237		522	80539.3	2410000	5090000		522	80539.3	3623548	6609366
		523	35594.5	2450672	3659804		523	76753.5	2500000	5410000		523	76753.5	3755645	6992850
		524	35828	2543438	3805386		524	70949.4	2580000	5680000		524	70949.4	3876287	7377299
		525	34467.9	2628824	3946062		525	68882.5	2660000	5950000		525	68882.5	3965584	7691160
		526	31193.9	2700211	4077612		526	64349.9	2720000	6170000		526	64349.9	4048150	8012925
		527	33670.1	2764228	4184507		527	63466.4	2760000	6410000		527	63466.4	4113320	8283590
		528	31656.9	2828919	4306100		528	60105.4	2800000	6590000		528	60105.4	4143534	8501717
		529	29919.2	2890993	4375837		529	59213.7	2790000	6730000		529	59213.7	4141534	8701040
		530	29668.3	2931012	4449794		530	54230.7	2800000	6870000		530	54230.7	4131122	8854878
		531	29826.8	2965243	4496492		531	54188.2	2800000	6970000		531	54188.2	4118399	8953530
		532	29017.6	2990063	4520267		532	51150.5	2790000	7040000		532	51150.5	4080913	9026527
		533	28658.3	2993926	4533975		533	49866.9	2740000	7060000		533	49866.9	4022527	9041469
		534	26754.4	3004503	4547176		534	48648.1	2710000	7060000		534	48648.1	3929644	9048269
		535	26191.1	2987354	4546798		535	45922.9	2670000	7020000		535	45922.9	3862261	8975881
		536	24265.3	2976270	4510418		536	46284	2600000	6940000		536	46284	3755342	8892102
		537	26458.4	2955334	4466741		537	44080.1	2540000	6880000		537	44080.1	3657381	8792723
		538	25786.3	2906175	4425278		538	42398	2480000	6800000		538	42398	3553680	8647866
		539	24984.7	2871969	4361238		539	42375.6	2400000	6690000		539	42375.6	3446100	8500329
		540	22621	2816178	4290483		540	40464.3	2320000	6560000		540	40464.3	3333752	8310930
		541	20895.9	2767099	4188444		541	38667.8	2240000	6400000		541	38667.8	3187540	8115914
		542	22439.3	2707489	4108394		542	37550.2	2180000	6260000		542	37550.2	3072816	7926538
		543	21277	2639469	4019576		543	36856.9	2100000	6070000		543	36856.9	2957725	7668651
		544	19849.8	2571114	3899646		544	37657.1	2030000	5890000		544	37657.1	2849936	7455442
		545	22284.3	2511518	3808122		545	38414	1950000	5740000		545	38414	2737544	7220218
		546	21144.2	2444578	3689544		546	40418.6	1870000	5560000		546	40418.6	2620899	6993368
		547	20919	2375007	3583718		547	37976.2	1790000	5350000		547	37976.2	2532979	6720334
		548	20562.7	2286640	3455741		548	38506.6	1710000	5170000		548	38506.6	2403210	6483274
		549	18144.5	2203363	3338269		549	35260.8	1650000	5010000		549	35260.8	2303974	6237361
		550	18525.2	2149322	3241757		550	32551.8	1580000	4820000		550	32551.8	2200951	6017767
		551	17310	2070300	3118815		551	30949.7	1510000	4640000		551	30949.7	2108397	5775036
		552	16008	1991920	3014967		552	29178.3	1450000	4430000		552	29178.3	2001138	5546166
		553	15422.4	1917084	2900625		553	28509.6	1400000	4270000		553	28509.6	1918010	5320856
		554	15478.1	1847571	2789275		554	28711	1330000	4100000		554	28711	1837106	5084085
		555	15581.4	1787178	2692472		555	27178.5	1270000	3940000		555	27178.5	1759680	4911444
		556	13783.9	1711627	2584061		556	27341	1220000	3780000		556	27341	1692240	4713903
		557	13718.4	1646683	2491333		557	26269.4	1180000	3610000		557	26269.4	1617441	4504105
		558	13399.7	1582796	2398063		558	25625.6	1120000	3490000		558	25625.6	1556523	4334158
		559	15055.8	1531465	2300679		559	25703.1	1080000	3350000		559	25703.1	1493211	4159585
		560	13735.6	1477026	2215332		560	24331.2	1030000	3210000		560	24331.2	1448134	3994609
		561	14740.6	1420414	2137543		561	26475.2	1000000	3090000		561	26475.2	1385500	3859722
		562	13300.9	1366945	2052573		562	26334.8	973058	2970000		562	26334.8	1337925	3683510
		563	13083.4	1319630	1984798		563	23703.8	930986	2850000		563	23703.8	1297955	3531111
		564	13272.5	1260277	1904953		564	22799	890571	2750000		564	22799	1243473	3413395
		565	11901.3	1223697	1843636		565	21909.2	863688	2650000		565	21909.2	1200834	3317202
		566	11729.7	1177719	1774908		566	21911.6	835942	2550000		566	21911.6	1162780	3168111
		567	11307.1	1134179	1713734		567	20902.9	799841	2460000		567	20902.9	1123935	3073317
		568	11900.2	1093859	1654959		568	21916.1	778074	2370000		568	21916.1	1092315	2976772
		569	11429.6	1055673	1591725		569	20635.9	754771	2290000		569	20635.9	1037557	2852554
		570	11179.5	1019181	1536557		570	19561.1	726860	2210000		570	19561.1	1013068	2770158
		571	10057.3	982711	1493331		571	19854.8	705481	2140000		571	19854.8	984058	2667817
		572	10203.1	951800	1439870		572	20771.4	679394	2070000		572	20771.4	945463	2593473
		573	10585.3	916681	1391560		573	18539.2	658199	1990000		573	18539.2	916990	2507262
		574	10098.2	888591	1346257		574	19814.6	631842	1930000		574	19814.6	886001	2426927
		575	10054.9	858554	1302499		575	18516.6	611081	1870000		575	18516.6	855190	2346012
		576	10080.1	829952	1264784		576	17788.7	586009	1800000		576	17788.7	824672	2272218
		577	9188.62	803682	1218204		577	18018.6	568239	1730000		577	18018.6	794018	2174428
		578	9081.86	777976	1173374		578	18258	545038	1680000		578	18258	759563	2127906
		579	9338.03	750064	1142434		579	17524.7	523679	1620000		579	17524.7	737306	2051678
		580	9379.64	723659	1103093		580	18132.5	501290	1550000		580	18132.5	712566	1961580
